# Supplementary material for: Patient-Reported Outcomes Measurement Information System (PROMIS) instruments among individuals with symptomatic knee osteoarthritis: a cross-sectional study of floor/ceiling effects and construct validity
Source: BMC Musculoskelet Disord. 2015 Sep 14;16:253. doi: 10.1186/s12891-015-0715-y (PMC4570513; doi:10.1186/s12891-015-0715-y)
Supplement: Additional file 1: — The additional file contains a supplemental table entitled “Matrix of Spearman correlation coefficients between PROMIS short-form instruments and legacy measures.” The file also includes the raw data used for the figures and the appropriate references. (XLSX 48 kb) [file 12891_2015_715_MOESM1_ESM.xlsx]

## Sheet: Supplementary Table
Supplementary Table. Matrix of Spearman correlation coefficients between PROMIS short-form instruments and legacy measures
	Pain		Function					Psychological Health
PROMIS Instrument (n=204)	SF-36	WOMAC	SF-36	SF-36	WOMAC	6-min Walk Test^	20-m	PSS	BDI-II	SF-36
	BP	Pain	PCS^	PF	Function		Walk Test			MCS^
Pain Interference
Previosly Reported Correlations	-0.87 to -0.781	0.34 to 0.70	-0.80 to -0.681	-0.66 to -0.22	0.38 to 0.66	-0.52 to -0.16	0.01 to 0.281	0.25 to 0.58	0.18 to 0.46	-0.46 to -0.221
Actual Correlation	-0.73 (-0.79 to -0.65)	0.47 (0.35 to 0.57)	-0.73 (-0.79 to -0.66)	-0.62 (-0.70 to -0.53)	0.43 (0.32 to 0.54)	-0.38 (-0.49 to -0.25)	0.34 (0.21 to 0.45)	0.46 (0.34 to 0.56)	0.55 (0.45 to 0.64)	-0.47 (-0.57 to -0.35)
Physical Function^
Previosly Reported Correlations	0.56 to 0.66	-0.72 to -0.44	0.75 to 0.851	0.85 to 0.911	-0.76 to -0.54	0.35 to 0.73	-0.52 to -0.44	-.23 to -0.07	-.35 to -0.07	0.01 to 0.281
Actual Correlation	0.59 (0.49 to 0.67)	-0.39 (-0.50, -0.27)	0.76 (0.69 to 0.81)	0.79 (0.73 to 0.84)	-0.48 (-0.58 to -0.36)	0.46 (0.34 to 0.56)	-0.43 (-0.53 to -0.31)	-0.38 (-0.49 to -0.26)	-0.53 (-0.63 to -0.43)	0.39 (0.27 to 0.50)
Anxiety
Previosly Reported Correlations	-0.58 to -0.25	0.15 to 0.29	-0.36 to -0.22	-0.12 to -0.07	0.13 to 0.36	-0.37 to -0.10	0.10 to 0.37	0.65 to 0.80	0.54 to 0.75	-0.72 to -0.19
Actual Correlation	-0.41 (-0.52 to -0.28)	0.20 (0.06 to 0.33)	-0.40 (-0.51 to -0.27)	-0.34 (-0.46 to -0.21)	0.17 (0.04 to 0.31)	-0.19 (-0.32 to -0.05)	0.17 (0.03 to 0.30)	0.71 (0.64 to 0.77)	0.70 (0.62 to 0.76)	-0.58 (-0.66 to -0.48)
Depression
Previosly Reported Correlations	-0.40 to -0.18	0.17 to 0.46	-0.39 to 0.00	-0.35 to -0.07	0.30 to 0.47	-0.37 to -0.05	0.09 to 0.351	0.54 to 0.75	0.59 to 0.83	-0.70 to -0.54
Actual Correlation	-0.31 (-0.43 to -0.18)	0.19 (0.05 to 0.32)	-0.30 (-0.42 to -0.17)	-0.31 (-0.43 to -0.18)	0.10 (-0.04 to 0.23)	-0.11 (-0.24 to 0.03)	0.11 (-0.03 to 0.24)	0.65 (0.56 to 0.72)	0.70 (0.62 to 0.76)	-0.59 (-0.68 to -0.49)
PROMIS = Patient Reported Outcomes Measurement Information System; SF-36 = Medical Outcomes Short Form-36, MCS = Mental Component Summary, PCS = Physical Component Summary, BP = Bodily Pain; WOMAC = Western Ontario and McMaster Universities Arthritic Index; PSS = Perceived Stress Scale; BDI-II = Beck Depression Index II.Key correlations for convergent validity are shaded along the diagonal.^Highe…

## Sheet: Extracted Data for Figures
First Author	Year	Journal	Study Population	Instrument 1	Instrument 2	Comparisons	Measure of Association	OriginalAssociation	Association in Figure	PROs in Figure	Population in Figure
Amtmann D	2010	Pain	Community Supplemented w Individuals w Pain	PROMIS Pain Interference	PROMIS Physical Function	PROMIS Pain Interference+PROMIS Physical Function	Pearson/Spearman Coefficients	-0.55	-0.55	PROMIS PI + SF-36 PF	Primarily Healthy Population
Amtmann D	2010	Pain	Community Supplemented w Individuals w Pain	PROMIS Pain Interference	PROMIS Physical Function			-0.55	-0.55	PROMIS PI + SF-36 PCS	Primarily Healthy Population
Amtmann D	2010	Pain	Community Supplemented w Individuals w Pain	PROMIS Pain Interference	PROMIS Physical Function			-0.55	-0.55	PROMIS PF + SF-36 BP	Primarily Healthy Population
Amtmann D	2010	Pain	Community Supplemented w Individuals w Pain	PROMIS Pain Interference	PROMIS Anxiety	PROMIS Pain Interference+PROMIS Anxiety	Pearson/Spearman Coefficients	0.35	0.35	PROMIS PI + PSS	Primarily Healthy Population
Amtmann D	2010	Pain	Community Supplemented w Individuals w Pain	PROMIS Pain Interference	PROMIS Anxiety			0.35	0.35	PROMIS Anxiety + SF-36 BP	Primarily Healthy Population
Amtmann D	2010	Pain	Community Supplemented w Individuals w Pain	PROMIS Pain Interference	PROMIS Depression	PROMIS Pain Interference+PROMIS Depression	Pearson/Spearman Coefficients	0.33	0.33	PROMIS PI + BDI-II	Primarily Healthy Population
Amtmann D	2010	Pain	Community Supplemented w Individuals w Pain	PROMIS Pain Interference	PROMIS Depression			0.33	0.33	PROMIS Depression + SF-36 BP	Primarily Healthy Population
Amtmann D	2010	Pain	Community Supplemented w Individuals w Pain	PROMIS Pain Interference	BPI Interference Scale	PROMIS Pain Interference+BPI Interference Scale	Pearson/Spearman Coefficients	0.9	0.9	PROMIS PI + SF-36 BP	Primarily Healthy Population
Amtmann D	2010	Pain	Community Supplemented w Individuals w Pain	PROMIS Pain Interference	SF-36 Bodily Pain Subscale	PROMIS Pain Interference+SF-36 Bodily Pain Subscale	Pearson/Spearman Coefficients	-0.84	-0.84	PROMIS PI + SF-36 BP	Primarily Healthy Population
Hinchcliff	2011	Arthritis Care Res	Systemic Sclerosis	PROMIS-29 Anxiety	SF-36 Mental Component Score	PROMIS-29 Anxiety+SF-36 Mental Component Score	Spearman Coefficients	-0.5	-0.5	PROMIS Anxiety + SF-36 MCS	Other Chronic Disease
Hinchcliff	2011	Arthritis Care Res	Systemic Sclerosis	PROMIS-29 Depression	SF-36 Mental Component Score	PROMIS-29 Depression+SF-36 Mental Component Score	Spearman Coefficients	-0.7	-0.7	PROMIS Depression + SF-36 MCS	Other Chronic Disease
Hinchcliff	2011	Arthritis Care Res	Systemic Sclerosis	PROMIS-29 Physical Functioning	SF-36 Physical Component Score	PROMIS-29 Physical Functioning+SF-36 Physical Component Score	Spearman Coefficients	0.86	0.86	PROMIS PF + SF-36 MCS	Other Chronic Disease
Khanna D	2012	Value Health	Systemic Sclerosis	PROMIS Depression v1	CES-D	PROMIS Depression v1+CES-D	Correlation coefficient?	0.67	0.67	PROMIS Depression + BDI-II	Other Chronic Disease
Khanna D	2012	Value Health	Systemic Sclerosis	PROMIS Depression v1	SF-36 Bodily Pain Subscale	PROMIS Depression v1+SF-36 Bodily Pain Subscale	Correlation coefficient?	0.31	0.31	PROMIS Depression + SF-36 BP	Other Chronic Disease
Khanna D	2012	Value Health	Systemic Sclerosis	PROMIS Depression v1	SF-36 Bodily Pain Subscale			0.31	0.31	PROMIS PI + BDI-II	Other Chronic Disease
Khanna D	2012	Value Health	Systemic Sclerosis	PROMIS Physical Function v1	CES-D	PROMIS Physical Function v1+CES-D	Correlation coefficient?	0.46	0.46	PROMIS PF + BDI-II	Other Chronic Disease
Khanna D	2012	Value Health	Systemic Sclerosis	PROMIS Physical Function v1	CES-D			0.46	0.46	PROMIS Depression + SF-36 PF	Other Chronic Disease
Khanna D	2012	Value Health	Systemic Sclerosis	PROMIS Physical Function v1	CES-D			0.46	0.46	PROMIS Depression + SF-36 PCS	Other Chronic Disease
Khanna D	2012	Value Health	Systemic Sclerosis	PROMIS Physical Function v1	SF-36 Bodily Pain Subscale	PROMIS Physical Function v1+SF-36 Bodily Pain Subscale	Correlation coefficient?	0.56	0.56	PROMIS PF + SF-36 BP	Other Chronic Disease
Khanna D	2012	Value Health	Systemic Sclerosis	PROMIS Physical Function v1	SF-36 Bodily Pain Subscale			0.56	0.56	PROMIS PI + SF-36 PF	Other Chronic Disease
Khanna D	2012	Value Health	Systemic Sclerosis	PROMIS Physical Function v1	SF-36 Bodily Pain Subscale			0.56	0.56	PROMIS PI + SF-36 PCS	Other Chronic Disease
Kuiper NA	1986	J Human Stress	College Students	BDI	PSS	BDI+PSS	Correlation coefficient?	0.58	0.58	PROMIS Depression + PSS	Primarily Healthy Population
Kuiper NA	1986	J Human Stress	College Students	BDI	PSS			0.58	0.58	PROMIS Anxiety + BDI-II	Primarily Healthy Population
Lee S	2000	J Psychosom Res	patients with non-ulcer dyspepsia	BDI	Spielberger State -Trait Anxiety Inventory: State	BDI+Spielberger State -Trait Anxiety Inventory: State	Pearson Correlations	0.36	0.36	PROMIS Depression + PSS	Other Chronic Disease
Lee S	2000	J Psychosom Res	patients with non-ulcer dyspepsia	BDI	Spielberger State -Trait Anxiety Inventory: State			0.36	0.36	PROMIS Anxiety + BDI-II	Other Chronic Disease
Lee S	2000	J Psychosom Res	patients with non-ulcer dyspepsia	BDI	Spielberger State -Trait Anxiety Inventory: Trait	BDI+Spielberger State -Trait Anxiety Inventory: Trait	Pearson Correlations	0.35	0.35	PROMIS Depression + PSS	Other Chronic Disease
Lee S	2000	J Psychosom Res	patients with non-ulcer dyspepsia	BDI	Spielberger State -Trait Anxiety Inventory: Trait			0.35	0.35	PROMIS Anxiety + BDI-II	Other Chronic Disease
Lee S	2000	J Psychosom Res	patients with non-ulcer dyspepsia	BDI	quantity of perceived stressful life events	BDI+quantity of perceived stressful life events	Pearson Correlations	0.55	0.55	PROMIS Depression + PSS	Other Chronic Disease
Lee S	2000	J Psychosom Res	patients with non-ulcer dyspepsia	BDI	quantity of perceived stressful life events			0.55	0.55	PROMIS Anxiety + BDI-II	Other Chronic Disease
Boury JM	2004	Women & Health	Postpartum in Low-Income Women	BDI	PSS	BDI+PSS	Pearson Correlations	0.65	0.65	PROMIS Depression + PSS	Other
Boury JM	2004	Women & Health	Postpartum in Low-Income Women	BDI	PSS			0.65	0.65	PROMIS Anxiety + BDI-II	Other
Segal DL	2008	Behavior Modification	College Students and Community Dwelling Older Adults	BDI-II	PSS	BDI-II+PSS	Pearson Correlations	0.67	0.67	PROMIS Depression + PSS	Primarily Healthy Population
Segal DL	2008	Behavior Modification	College Students and Community Dwelling Older Adults	BDI-II	PSS			0.67	0.67	PROMIS Anxiety + BDI-II	Primarily Healthy Population
Segal DL	2008	Behavior Modification	Community Dwelling Older Adults	BDI-II	PSS	BDI-II+PSS	Pearson Correlations	0.64	0.64	PROMIS Depression + PSS	Primarily Healthy Population
Segal DL	2008	Behavior Modification	Community Dwelling Older Adults	BDI-II	PSS			0.64	0.64	PROMIS Anxiety + BDI-II	Primarily Healthy Population
Segal DL	2008	Behavior Modification	Community Dwelling Older Adults	BDI-II	CES-D	BDI-II+CES-D	Pearson Correlations	0.69	0.69	PROMIS Depression + BDI-II	Primarily Healthy Population
Di Benedetto M	2007	Psychology, Health & Medicine	Post-Acute Cornary Syndrome	BDI-II	PSS	BDI-II+PSS	Pearson Correlations	0.64	0.64	PROMIS Depression + PSS	Other
Di Benedetto M	2007	Psychology, Health & Medicine	Post-Acute Cornary Syndrome	BDI-II	PSS			0.64	0.64	PROMIS Anxiety + BDI-II	Other
Georgin-Lavialle S	2014	Brain, Behavior, and Immunity	mastocytosis	BDI	PSS	BDI+PSS	Pearson Correlations?	0.59	0.59	PROMIS Depression + PSS	Other Chronic Disease
Georgin-Lavialle S	2014	Brain, Behavior, and Immunity	mastocytosis	BDI	PSS			0.59	0.59	PROMIS Anxiety + BDI-II	Other Chronic Disease
Jackson FM	2012	Women's Health Issues	Well-educated, Pregnant, African-American Women	BDI-II	PSS	BDI-II+PSS	Pearson Correlations	0.65	0.65	PROMIS Depression + PSS	Other
Jackson FM	2012	Women's Health Issues	Well-educated, Pregnant, African-American Women	BDI-II	PSS			0.65	0.65	PROMIS Anxiety + BDI-II	Other
Homann D	2012	Revista Brasileira de Reumatologia	Women w Fibromyalgia	BDI	PSS-10	BDI+PSS-10	Pearson Correlations	0.54	0.54	PROMIS Depression + PSS	Other Chronic Disease
Homann D	2012	Revista Brasileira de Reumatologia	Women w Fibromyalgia	BDI	PSS-10			0.54	0.54	PROMIS Anxiety + BDI-II	Other Chronic Disease
Hung M	2013	Clinical Orthopaedics and Related Research	patients undergoing common foot and ankle surgeries	PROMIS Physical Function (CAT)	PROMIS Pain (CAT)	PROMIS Physical Function (CAT)+PROMIS Pain (CAT)	Pearson Correlations	-0.6587	-0.6587	PROMIS PF + SF-36 BP	Other Chronic Disease
Hung M	2013	Clinical Orthopaedics and Related Research	patients undergoing common foot and ankle surgeries	PROMIS Physical Function (CAT)	PROMIS Pain (CAT)			-0.6587	-0.6587	PROMIS PI + SF-36 PF	Other Chronic Disease
Hung M	2013	Clinical Orthopaedics and Related Research	patients undergoing common foot and ankle surgeries	PROMIS Physical Function (CAT)	PROMIS Pain (CAT)			-0.6587	-0.6587	PROMIS PI + SF-36 PCS	Other Chronic Disease
Cella D	2010	Journal of Clinical Epidemiology	US General Population	PROMIS Pain Interference Short Form	SF-36BP	PROMIS Pain Interference Short Form+SF-36BP	Correlation coefficient?	-0.82	-0.82	PROMIS PI + SF-36 BP	Primarily Healthy Population
Cella D	2010	Journal of Clinical Epidemiology	US General Population	PROMIS Anxiety Bank	CES-D	PROMIS Anxiety Bank+CES-D	Correlation coefficient?	0.75	0.75	PROMIS Anxiety + BDI-II	Primarily Healthy Population
Cella D	2010	Journal of Clinical Epidemiology	US General Population	PROMIS Anxiety Bank	CES-D			0.75	0.75	PROMIS Depression + PSS	Primarily Healthy Population
Cella D	2010	Journal of Clinical Epidemiology	US General Population	PROMIS Anxiety Bank	Mood and Anxiety Symptom Questionnaire (MASQ)	PROMIS Anxiety Bank+Mood and Anxiety Symptom Questionnaire (MASQ)	Correlation coefficient?	0.8	0.8	PROMIS Anxiety + PSS	Primarily Healthy Population
Cella D	2010	Journal of Clinical Epidemiology	US General Population	PROMIS Depression Bank	CES-D	PROMIS Depression Bank+CES-D	Correlation coefficient?	0.83	0.83	PROMIS Depression + BDI-II	Primarily Healthy Population
Cella D	2010	Journal of Clinical Epidemiology	US General Population	PROMIS Depression Bank	Mood and Anxiety Symptom Questionnaire (MASXQ)	PROMIS Depression Bank+Mood and Anxiety Symptom Questionnaire (MASXQ)	Correlation coefficient?	0.72	0.72	PROMIS Depression + PSS	Primarily Healthy Population
Cella D	2010	Journal of Clinical Epidemiology	US General Population	PROMIS Depression Bank	Mood and Anxiety Symptom Questionnaire (MASXQ)			0.72	0.72	PROMIS Anxiety + BDI-II	Primarily Healthy Population
Beier M	2013	CMSC (Poster)	Multiple Sclerosis	PROMIS Anxiety	PSS	PROMIS Anxiety+PSS	Pearson Correlations	0.69	0.69	PROMIS Anxiety + PSS	Other Chronic Disease
Beier M	2013	CMSC (Poster)	Multiple Sclerosis	PROMIS Pain	PSS	PROMIS Pain+PSS	Pearson Correlations	0.41	0.41	PROMIS PI + PSS	Other Chronic Disease
Beier M	2013	CMSC (Poster)	Multiple Sclerosis	PROMIS Pain	PSS			0.41	0.41	PROMIS Anxiety + SF-36 BP	Other Chronic Disease
Bajaj JS	2011	Alimentary Pharmacology and Therapeutics	Patients with Cirrhosis	PROMIS Anxiety CAT	Beck Depression Inventory	PROMIS Anxiety CAT+Beck Depression Inventory	Pearson Correlations	0.6	0.6	PROMIS Anxiety + BDI-II	Other Chronic Disease
Bajaj JS	2011	Alimentary Pharmacology and Therapeutics	Patients with Cirrhosis	PROMIS Anxiety CAT	Beck Depression Inventory			0.6	0.6	PROMIS Depression + PSS	Other Chronic Disease
Bajaj JS	2011	Alimentary Pharmacology and Therapeutics	Patients with Cirrhosis	PROMIS Depression CAT	Beck Depression Inventory	PROMIS Depression CAT+Beck Depression Inventory	Pearson Correlations	0.59	0.59	PROMIS Depression + BDI-II	Other Chronic Disease
Bajaj JS	2011	Alimentary Pharmacology and Therapeutics	Patients with Cirrhosis	PROMIS Anxiety CAT	Beck Anxiety Inventory	PROMIS Anxiety CAT+Beck Anxiety Inventory	Pearson Correlations	0.65	0.65	PROMIS Anxiety + PSS	Other Chronic Disease
Bajaj JS	2011	Alimentary Pharmacology and Therapeutics	Patients with Cirrhosis	PROMIS Depression CAT	Beck Anxiety Inventory	PROMIS Depression CAT+Beck Anxiety Inventory	Pearson Correlations	0.58	0.58	PROMIS Depression + PSS	Other Chronic Disease
Bajaj JS	2011	Alimentary Pharmacology and Therapeutics	Patients with Cirrhosis	PROMIS Depression CAT	Beck Anxiety Inventory			0.58	0.58	PROMIS Anxiety + BDI-II	Other Chronic Disease
Senders A	2014	Multiple Sclerosis Journal	Multiple Sclerosis	PROMIS Depression	Beck Depression Inventory 1	PROMIS Depression+Beck Depression Inventory 1	Correlation coefficient?	0.8	0.8	PROMIS Depression + BDI-II	Other Chronic Disease
Senders A	2014	Multiple Sclerosis Journal	Multiple Sclerosis	PROMIS Depression	STAI (Trait Anxiety Subscale)	PROMIS Depression+STAI (Trait Anxiety Subscale)	Correlation coefficient?	0.75	0.75	PROMIS Depression + PSS	Other Chronic Disease
Senders A	2014	Multiple Sclerosis Journal	Multiple Sclerosis	PROMIS Depression	STAI (Trait Anxiety Subscale)			0.75	0.75	PROMIS Anxiety + BDI-II	Other Chronic Disease
Senders A	2014	Multiple Sclerosis Journal	Multiple Sclerosis	PROMIS Depression	SF-36 Physical Function	PROMIS Depression+SF-36 Physical Function	Correlation coefficient?	-0.29	-0.29	PROMIS Depression + SF-36 PF	Other Chronic Disease
Senders A	2014	Multiple Sclerosis Journal	Multiple Sclerosis	PROMIS Depression	SF-36 Physical Function			-0.29	-0.29	PROMIS Depression + SF-36 PCS	Other Chronic Disease
Senders A	2014	Multiple Sclerosis Journal	Multiple Sclerosis	PROMIS Depression	SF-36 Physical Function			-0.29	-0.29	PROMIS PF + BDI-II	Other Chronic Disease
Senders A	2014	Multiple Sclerosis Journal	Multiple Sclerosis	PROMIS Anxiety	Beck Depression Inventory 1	PROMIS Anxiety+Beck Depression Inventory 1	Correlation coefficient?	0.69	0.69	PROMIS Anxiety + BDI-II	Other Chronic Disease
Senders A	2014	Multiple Sclerosis Journal	Multiple Sclerosis	PROMIS Anxiety	Beck Depression Inventory 1			0.69	0.69	PROMIS Depression + PSS	Other Chronic Disease
Senders A	2014	Multiple Sclerosis Journal	Multiple Sclerosis	PROMIS Anxiety	STAI (Trait Anxiety Subscale)	PROMIS Anxiety+STAI (Trait Anxiety Subscale)	Correlation coefficient?	0.67	0.67	PROMIS Anxiety + PSS	Other Chronic Disease
Senders A	2014	Multiple Sclerosis Journal	Multiple Sclerosis	PROMIS Anxiety	SF-36 Physical Function	PROMIS Anxiety+SF-36 Physical Function	Correlation coefficient?	-0.12	-0.12	PROMIS Anxiety + SF-36 PF	Other Chronic Disease
Senders A	2014	Multiple Sclerosis Journal	Multiple Sclerosis	PROMIS Anxiety	SF-36 Physical Function			-0.12	-0.12	PROMIS Anxiety + SF-36 PCS	Other Chronic Disease
Senders A	2014	Multiple Sclerosis Journal	Multiple Sclerosis	PROMIS Anxiety	SF-36 Physical Function			-0.12	-0.12	PROMIS PF + PSS	Other Chronic Disease
Senders A	2014	Multiple Sclerosis Journal	Multiple Sclerosis	PROMIS Physical Function	Beck Depression Inventory 1	PROMIS Physical Function+Beck Depression Inventory 1	Correlation coefficient?	-0.35	-0.35	PROMIS PF + BDI-II	Other Chronic Disease
Senders A	2014	Multiple Sclerosis Journal	Multiple Sclerosis	PROMIS Physical Function	Beck Depression Inventory 1			-0.35	-0.35	PROMIS Depression + SF-36 PF	Other Chronic Disease
Senders A	2014	Multiple Sclerosis Journal	Multiple Sclerosis	PROMIS Physical Function	Beck Depression Inventory 1			-0.35	-0.35	PROMIS Depression + SF-36 PCS	Other Chronic Disease
Senders A	2014	Multiple Sclerosis Journal	Multiple Sclerosis	PROMIS Physical Function	STAI (Trait Anxiety Subscale)	PROMIS Physical Function+STAI (Trait Anxiety Subscale)	Correlation coefficient?	-0.23	-0.23	PROMIS PF + PSS	Other Chronic Disease
Senders A	2014	Multiple Sclerosis Journal	Multiple Sclerosis	PROMIS Physical Function	STAI (Trait Anxiety Subscale)			-0.23	-0.23	PROMIS Anxiety + SF-36 PF	Other Chronic Disease
Senders A	2014	Multiple Sclerosis Journal	Multiple Sclerosis	PROMIS Physical Function	STAI (Trait Anxiety Subscale)			-0.23	-0.23	PROMIS Anxiety + SF-36 PCS	Other Chronic Disease
Senders A	2014	Multiple Sclerosis Journal	Multiple Sclerosis	PROMIS Physical Function	SF-36 Physical Function	PROMIS Physical Function+SF-36 Physical Function	Correlation coefficient?	0.87	0.87	PROMIS PF + SF-36 PF	Other Chronic Disease
Senders A	2014	Multiple Sclerosis Journal	Multiple Sclerosis	PROMIS Physical Function	SF-36 Physical Function			0.87	0.87	PROMIS PF + SF-36 PCS	Other Chronic Disease
Senders A	2014	Multiple Sclerosis Journal	Multiple Sclerosis	PROMIS Pain Interference	Beck Depression Inventory 1	PROMIS Pain Interference+Beck Depression Inventory 1	Correlation coefficient?	0.46	0.46	PROMIS PI + BDI-II	Other Chronic Disease
Senders A	2014	Multiple Sclerosis Journal	Multiple Sclerosis	PROMIS Pain Interference	Beck Depression Inventory 1			0.46	0.46	PROMIS Depression + SF-36 BP	Other Chronic Disease
Senders A	2014	Multiple Sclerosis Journal	Multiple Sclerosis	PROMIS Pain Interference	STAI (Trait Anxiety Subscale)	PROMIS Pain Interference+STAI (Trait Anxiety Subscale)	Correlation coefficient?	0.39	0.39	PROMIS PI + PSS	Other Chronic Disease
Senders A	2014	Multiple Sclerosis Journal	Multiple Sclerosis	PROMIS Pain Interference	STAI (Trait Anxiety Subscale)			0.39	0.39	PROMIS Anxiety + SF-36 BP	Other Chronic Disease
Senders A	2014	Multiple Sclerosis Journal	Multiple Sclerosis	PROMIS Pain Interference	SF-36 Physical Function	PROMIS Pain Interference+SF-36 Physical Function	Correlation coefficient?	-0.44	-0.44	PROMIS PI + SF-36 PF	Other Chronic Disease
Senders A	2014	Multiple Sclerosis Journal	Multiple Sclerosis	PROMIS Pain Interference	SF-36 Physical Function			-0.44	-0.44	PROMIS PI + SF-36 PCS	Other Chronic Disease
Senders A	2014	Multiple Sclerosis Journal	Multiple Sclerosis	PROMIS Pain Interference	SF-36 Physical Function			-0.44	-0.44	PROMIS PF + SF-36 BP	Other Chronic Disease
Palmieri VO	2013	Clinical and Experimental Medicine	Cirrhosis	SCL-R: Anxiety	SF-36 BP	SCL-R: Anxiety+SF-36 BP	Pearson Correlations	-0.25	-0.25	PROMIS Anxiety + SF-36 BP	Other Chronic Disease
Palmieri VO	2013	Clinical and Experimental Medicine	Cirrhosis	SCL-R: Anxiety	SF-36 BP			-0.25	-0.25	PROMIS PI + PSS	Other Chronic Disease
Palmieri VO	2013	Clinical and Experimental Medicine	hapatocellular carcinoma	SCL-R: Anxiety	SF-36 BP	SCL-R: Anxiety+SF-36 BP	Pearson Correlations	-0.56	-0.56	PROMIS Anxiety + SF-36 BP	Other Chronic Disease
Palmieri VO	2013	Clinical and Experimental Medicine	hapatocellular carcinoma	SCL-R: Anxiety	SF-36 BP			-0.56	-0.56	PROMIS PI + PSS	Other Chronic Disease
Palmieri VO	2013	Clinical and Experimental Medicine	Cirrhosis	SCL-R: Depression	SF-36 BP	SCL-R: Depression+SF-36 BP	Pearson Correlations	-0.28	-0.28	PROMIS Depression + SF-36 BP	Other Chronic Disease
Palmieri VO	2013	Clinical and Experimental Medicine	Cirrhosis	SCL-R: Depression	SF-36 BP			-0.28	-0.28	PROMIS PI + BDI-II	Other Chronic Disease
Palmieri VO	2013	Clinical and Experimental Medicine	hapatocellular carcinoma	SCL-R: Depression	SF-36 BP	SCL-R: Depression+SF-36 BP	Pearson Correlations	-0.43	-0.43	PROMIS Depression + SF-36 BP	Other Chronic Disease
Palmieri VO	2013	Clinical and Experimental Medicine	hapatocellular carcinoma	SCL-R: Depression	SF-36 BP			-0.43	-0.43	PROMIS PI + BDI-II	Other Chronic Disease
Gandhi R	2010	Pain Res Manag	Hip and Knee OA	HADS-Anxiety	SF-36 BP	HADS-Anxiety+SF-36 BP	Spearman Coefficients	-0.27	-0.27	PROMIS Anxiety + SF-36 BP	Osteoarthritis
Gandhi R	2010	Pain Res Manag	Hip and Knee OA	HADS-Anxiety	SF-36 BP			-0.27	-0.27	PROMIS PI + PSS	Osteoarthritis
Gandhi R	2010	Pain Res Manag	Hip and Knee OA	HADS-Anxiety	WOMAC	HADS-Anxiety+WOMAC	Spearman Coefficients	0.29	0.29	PROMIS Anxiety + WOMAC Pain	Osteoarthritis
Gandhi R	2010	Pain Res Manag	Hip and Knee OA	HADS-Depression	SF-36 BP	HADS-Depression+SF-36 BP	Spearman Coefficients	-0.4	-0.4	PROMIS Depression + SF-36 BP	Osteoarthritis
Gandhi R	2010	Pain Res Manag	Hip and Knee OA	HADS-Depression	SF-36 BP			-0.4	-0.4	PROMIS PI + BDI-II	Osteoarthritis
Gandhi R	2010	Pain Res Manag	Hip and Knee OA	HADS-Depression	WOMAC	HADS-Depression+WOMAC	Spearman Coefficients	0.35	0.35	PROMIS Depression + WOMAC Pain	Osteoarthritis
Gandhi R	2010	Pain Res Manag	Hip and Knee OA	SF-36 BP	WOMAC	SF-36 BP+WOMAC	Spearman Coefficients	-0.7	-0.7	PROMIS PI + WOMAC Pain	Osteoarthritis
Lin RF	2010	Kaohsiung J Med Sci	Chronic neck pain	Beck Anxiety Inventory	SF-36 PCS	Beck Anxiety Inventory+SF-36 PCS	Spearman Coefficients	-0.36	-0.36	PROMIS Anxiety + SF-36 PCS	Other Chronic Disease
Lin RF	2010	Kaohsiung J Med Sci	Chronic neck pain	Beck Anxiety Inventory	SF-36 PCS			-0.36	-0.36	PROMIS Anxiety + SF-36 PF	Other Chronic Disease
Lin RF	2010	Kaohsiung J Med Sci	Chronic neck pain	Beck Anxiety Inventory	SF-36 Mental Component Score	Beck Anxiety Inventory+SF-36 Mental Component Score	Spearman Coefficients	-0.41	-0.41	PROMIS Anxiety + SF-36 MCS	Other Chronic Disease
Xie F	2008	Quality of Life Research	Patients scheduled for total knee	SF-36 BP	English WOMAC Pain	SF-36 BP+English WOMAC Pain	Spearman Coefficients	-0.34	-0.34	PROMIS PI + WOMAC Pain	Osteoarthritis
Xie F	2008	Quality of Life Research	Patients scheduled for total knee	SF-36 BP	English WOMAC Pain	SF-36 BP+English WOMAC Pain	Spearman Coefficients	-0.38	-0.38	PROMIS PI + WOMAC Pain	Osteoarthritis
Xie F	2008	Quality of Life Research	Patients scheduled for total knee	SF-36 BP	Chinese WOMAC Pain	SF-36 BP+Chinese WOMAC Pain	Spearman Coefficients	-0.2	-0.2	PROMIS PI + WOMAC Pain	Osteoarthritis
Xie F	2008	Quality of Life Research	Patients scheduled for total knee	SF-36 BP	Chinese WOMAC Function	SF-36 BP+Chinese WOMAC Function	Spearman Coefficients	-0.14	-0.14	PROMIS PI + WOMAC Function	Osteoarthritis
Piccinni A	2006	Comprehensive Psychiatry	Rheumatoid arthritis	MOODS Depressive	MOS SF-36 BP	MOODS Depressive+MOS SF-36 BP	Spearman Coefficients?	-0.18	-0.18	PROMIS Depression + SF-36 BP	Other Chronic Disease
Piccinni A	2006	Comprehensive Psychiatry	Rheumatoid arthritis	MOODS Depressive	MOS SF-36 BP			-0.18	-0.18	PROMIS PI + BDI-II	Other Chronic Disease
Neumann L	2000	Semin Arthritis Rheum	Fibromyalgia	Arthritis Impact Measurement Scales (AIMS)- Anxiety	SF-36 BP	Arthritis Impact Measurement Scales (AIMS)- Anxiety+SF-36 BP	Pearson Correlations	0.38	0.38	PROMIS Anxiety + SF-36 BP	Other Chronic Disease
Neumann L	2000	Semin Arthritis Rheum	Fibromyalgia	Arthritis Impact Measurement Scales (AIMS)- Anxiety	SF-36 BP			0.38	0.38	PROMIS PI + PSS	Other Chronic Disease
Neumann L	2000	Semin Arthritis Rheum	Fibromyalgia	Arthritis Impact Measurement Scales (AIMS) - Depression	SF-36 BP	Arthritis Impact Measurement Scales (AIMS) - Depression+SF-36 BP	Pearson Correlations	0.39	0.39	PROMIS Depression + SF-36 BP	Other Chronic Disease
Neumann L	2000	Semin Arthritis Rheum	Fibromyalgia	Arthritis Impact Measurement Scales (AIMS) - Depression	SF-36 BP			0.39	0.39	PROMIS PI + BDI-II	Other Chronic Disease
Neumann L	2000	Semin Arthritis Rheum	Fibromyalgia	Arthritis Impact Measurement Scales (AIMS)- Anxiety	SF-36 MH	Arthritis Impact Measurement Scales (AIMS)- Anxiety+SF-36 MH	Pearson Correlations	0.51	0.51	PROMIS Anxiety + SF-36 MCS	Other Chronic Disease
Neumann L	2000	Semin Arthritis Rheum	Fibromyalgia	Arthritis Impact Measurement Scales (AIMS) - Depression	SF-36 MH	Arthritis Impact Measurement Scales (AIMS) - Depression+SF-36 MH	Pearson Correlations	0.65	0.65	PROMIS Depression + SF-36 MCS	Other Chronic Disease
Ozcetin A	2007	West Indian Med J	Rheumatoid arthritis	Beck Anxiety Inventory	SF-36 BP	Beck Anxiety Inventory+SF-36 BP	Pearson Correlations	-0.58	-0.58	PROMIS Anxiety + SF-36 BP	Other Chronic Disease
Ozcetin A	2007	West Indian Med J	Rheumatoid arthritis	Beck Anxiety Inventory	SF-36 BP			-0.58	-0.58	PROMIS PI + PSS	Other Chronic Disease
Ozcetin A	2007	West Indian Med J	Knee Osteoarthritis	Beck Anxiety Inventory	SF-36 BP	Beck Anxiety Inventory+SF-36 BP	Pearson Correlations	-0.58	-0.58	PROMIS Anxiety + SF-36 BP	Osteoarthritis
Ozcetin A	2007	West Indian Med J	Knee Osteoarthritis	Beck Anxiety Inventory	SF-36 BP			-0.58	-0.58	PROMIS PI + PSS	Osteoarthritis
Ozcetin A	2007	West Indian Med J	Fibromyalgia	Beck Anxiety Inventory	SF-36 BP	Beck Anxiety Inventory+SF-36 BP	Pearson Correlations	-0.48	-0.48	PROMIS Anxiety + SF-36 BP	Other Chronic Disease
Ozcetin A	2007	West Indian Med J	Fibromyalgia	Beck Anxiety Inventory	SF-36 BP			-0.48	-0.48	PROMIS PI + PSS	Other Chronic Disease
Ozcetin A	2007	West Indian Med J	Rheumatoid arthritis	Beck Anxiety Inventory	SF-36 MH	Beck Anxiety Inventory+SF-36 MH	Pearson Correlations	-0.66	-0.66	PROMIS Anxiety + SF-36 MCS	Other Chronic Disease
Ozcetin A	2007	West Indian Med J	Knee Osteoarthritis	Beck Anxiety Inventory	SF-36 MH	Beck Anxiety Inventory+SF-36 MH	Pearson Correlations	-0.72	-0.72	PROMIS Anxiety + SF-36 MCS	Osteoarthritis
Ozcetin A	2007	West Indian Med J	Fibromyalgia	Beck Anxiety Inventory	SF-36 MH	Beck Anxiety Inventory+SF-36 MH	Pearson Correlations	-0.18	-0.18	PROMIS Anxiety + SF-36 MCS	Other Chronic Disease
Fuh J	2000	Quality of Life Research	Rural Community - China	SF-36 BP	SF-36 MH	SF-36 BP+SF-36 MH	Spearman Coefficients	0.33	0.33	PROMIS PI + SF-36 MCS	Primarily Healthy Population
Papakostidou I	2012	BMC MSK	Before and after total knee replacement	CES-D10	WOMAC pain	CES-D10+WOMAC pain	Pearson Correlations	0.46	0.46	PROMIS Depression + WOMAC Pain	Osteoarthritis
Wolfe F	1999	Rheumatology	OA, RA, Fibromyalgia	Arthritis Impact Measurement Scales (AIMS) - Depression	WOMAC function	Arthritis Impact Measurement Scales (AIMS) - Depression+WOMAC function	Spearman Coefficients	0.33	0.33	PROMIS Depression + WOMAC Function	Osteoarthritis
Wolfe F	1999	Rheumatology	OA, RA, Fibromyalgia	Arthritis Impact Measurement Scales (AIMS) - Depression	WOMAC pain	Arthritis Impact Measurement Scales (AIMS) - Depression+WOMAC pain	Spearman Coefficients	0.37	0.37	PROMIS Depression + WOMAC Pain	Osteoarthritis
Hirschmann MT	2013	Knee Surg sports Traumatol Arthroscopy	before total knee replacement	Becks Depression Inventory	WOMAC pain	Becks Depression Inventory+WOMAC pain	Spearman Coefficients	0.26	0.26	PROMIS Depression + WOMAC Pain	Osteoarthritis
Hirschmann MT	2013	Knee Surg sports Traumatol Arthroscopy	before total knee replacement	Anxiety Index State	WOMAC pain	Anxiety Index State+WOMAC pain	Spearman Coefficients	0.19	0.19	PROMIS Anxiety + WOMAC Pain	Osteoarthritis
Hirschmann MT	2013	Knee Surg sports Traumatol Arthroscopy	before total knee replacement	Anxiety Index Trait	WOMAC pain	Anxiety Index Trait+WOMAC pain	Spearman Coefficients	0.06	0.06	PROMIS Anxiety + WOMAC Pain	Osteoarthritis
Hirschmann MT	2013	Knee Surg sports Traumatol Arthroscopy	before total knee replacement	SCL-90 depression	WOMAC pain	SCL-90 depression+WOMAC pain	Spearman Coefficients	0.17	0.17	PROMIS Depression + WOMAC Pain	Osteoarthritis
Hirschmann MT	2013	Knee Surg sports Traumatol Arthroscopy	before total knee replacement	SCL-90 anxiety	WOMAC pain	SCL-90 anxiety+WOMAC pain	Spearman Coefficients	0.15	0.15	PROMIS Anxiety + WOMAC Pain	Osteoarthritis
Hirschmann MT	2013	Knee Surg sports Traumatol Arthroscopy	before total knee replacement	Becks Depression Inventory	WOMAC function	Becks Depression Inventory+WOMAC function	Spearman Coefficients	0.33	0.33	PROMIS Depression + WOMAC Function	Osteoarthritis
Hirschmann MT	2013	Knee Surg sports Traumatol Arthroscopy	before total knee replacement	Anxiety Index State	WOMAC function	Anxiety Index State+WOMAC function	Spearman Coefficients	0.3	0.3	PROMIS Anxiety + WOMAC Function	Osteoarthritis
Hirschmann MT	2013	Knee Surg sports Traumatol Arthroscopy	before total knee replacement	Anxiety Index Trait	WOMAC function	Anxiety Index Trait+WOMAC function	Spearman Coefficients	0.21	0.21	PROMIS Anxiety + WOMAC Function	Osteoarthritis
Hirschmann MT	2013	Knee Surg sports Traumatol Arthroscopy	before total knee replacement	SCL-90 depression	WOMAC function	SCL-90 depression+WOMAC function	Spearman Coefficients	0.31	0.31	PROMIS Depression + WOMAC Function	Osteoarthritis
Hirschmann MT	2013	Knee Surg sports Traumatol Arthroscopy	before total knee replacement	SCL-90 anxiety	WOMAC function	SCL-90 anxiety+WOMAC function	Spearman Coefficients	0.29	0.29	PROMIS Anxiety + WOMAC Function	Osteoarthritis
Axford J	2010	Clinical Rheumatology	lower limb OA	HADS Anxiety	WOMAC function	HADS Anxiety+WOMAC function	Kendall's tau-b	0.13	0.13	PROMIS Anxiety + WOMAC Function	Osteoarthritis
Axford J	2010	Clinical Rheumatology	lower limb OA	HADS Depression	WOMAC function	HADS Depression+WOMAC function	Kendall's tau-b	0.36	0.36	PROMIS Depression + WOMAC Function	Osteoarthritis
Davis AM	2009	Osteoarthritis Cartilage	before total hip replacement	HADS Anxiety	WOMAC function	HADS Anxiety+WOMAC function	Pearson Correlations	0.19	0.19	PROMIS Anxiety + WOMAC Function	Osteoarthritis
Davis AM	2009	Osteoarthritis Cartilage	before total hip replacement	HADS Depression	WOMAC function	HADS Depression+WOMAC function	Pearson Correlations	0.35	0.35	PROMIS Depression + WOMAC Function	Osteoarthritis
Davis AM	2009	Osteoarthritis Cartilage	before total knee replacement	HADS Anxiety	WOMAC function	HADS Anxiety+WOMAC function	Pearson Correlations	0.36	0.36	PROMIS Anxiety + WOMAC Function	Osteoarthritis
Davis AM	2009	Osteoarthritis Cartilage	before total knee replacement	HADS Depression	WOMAC function	HADS Depression+WOMAC function	Pearson Correlations	0.47	0.47	PROMIS Depression + WOMAC Function	Osteoarthritis
Guermazi M	2004	Osteoarthritis Cartilage	symptomatic knee oa	Beck Depression	Arabic WOMAC pain	Beck Depression+Arabic WOMAC pain	Spearman Coefficients	0.3	0.3	PROMIS Depression + WOMAC Pain	Osteoarthritis
Guermazi M	2004	Osteoarthritis Cartilage	symptomatic knee oa	Beck Depression	Arabic WOMAC function	Beck Depression+Arabic WOMAC function	Spearman Coefficients	0.3	0.3	PROMIS Depression + WOMAC Function	Osteoarthritis
Bilbao A	2011	Health and Quality of Life Outcomes	before total hip replacement	SF-36 BP	WOMAC Pain - short version	SF-36 BP+WOMAC Pain - short version	Spearman Coefficients	-0.48	-0.48	PROMIS PI + WOMAC Pain	Osteoarthritis
Bilbao A	2011	Health and Quality of Life Outcomes	before total hip replacement	SF-36 PF	WOMAC Pain - short version	SF-36 PF+WOMAC Pain - short version	Spearman Coefficients	-0.44	-0.44	PROMIS PF + WOMAC Pain	Osteoarthritis
Bilbao A	2011	Health and Quality of Life Outcomes	before total hip replacement	SF-36 BP	WOMAC Function - short version	SF-36 BP+WOMAC Function - short version	Spearman Coefficients	-0.5	-0.5	PROMIS PI + WOMAC Function	Osteoarthritis
Bilbao A	2011	Health and Quality of Life Outcomes	before total hip replacement	SF-36 PF	WOMAC Function - short version	SF-36 PF+WOMAC Function - short version	Spearman Coefficients	-0.54	-0.54	PROMIS PF + WOMAC Function	Osteoarthritis
Stolwijk-Swüste JM	2008	J Rehabil Med	poliomyelitis	SF-36 PF	10-m self-preferred speed	SF-36 PF+10-m self-preferred speed	Pearson Correlations	-0.52	-0.52	PROMIS PF + 20 meter Walk Test	Other Chronic Disease
Stolwijk-Swüste JM	2008	J Rehabil Med	poliomyelitis	SF-36 PF	2-minute walk test	SF-36 PF+2-minute walk test	Pearson Correlations	0.69	0.69	PROMIS PF + 6MWT	Other Chronic Disease
McCarthy CJ	2004	Rheumatology	Knee Osteoarthritis	SF-36 PF	8-m self-preferred speed	SF-36 PF+8-m self-preferred speed	Spearman Coefficients	-0.44	-0.44	PROMIS PF + 20 meter Walk Test	Osteoarthritis
Alkan BM	2014	Mod Rheumatol	Knee Osteoarthritis	SF-36 BP	WOMAC Pain	SF-36 BP+WOMAC Pain	Spearman Coefficients	-0.46	-0.46	PROMIS PI + WOMAC Pain	Osteoarthritis
Alkan BM	2014	Mod Rheumatol	Knee Osteoarthritis	SF-36 BP	WOMAC Function	SF-36 BP+WOMAC Function	Spearman Coefficients	-0.48	-0.48	PROMIS PI + WOMAC Function	Osteoarthritis
Alkan BM	2014	Mod Rheumatol	Knee Osteoarthritis	SF-36 PF	WOMAC Pain	SF-36 PF+WOMAC Pain	Spearman Coefficients	-0.53	-0.53	PROMIS PF + WOMAC Pain	Osteoarthritis
Alkan BM	2014	Mod Rheumatol	Knee Osteoarthritis	SF-36 PF	WOMAC Function	SF-36 PF+WOMAC Function	Spearman Coefficients	-0.59	-0.59	PROMIS PF + WOMAC Function	Osteoarthritis
Basaran S	2010	Clin Rheumatol	hip osteoarthritis	SF-36 BP	WOMAC Pain	SF-36 BP+WOMAC Pain	Pearson Correlations	-0.59	-0.59	PROMIS PI + WOMAC Pain	Osteoarthritis
Basaran S	2010	Clin Rheumatol	hip osteoarthritis	SF-36 PF	WOMAC Pain	SF-36 PF+WOMAC Pain	Pearson Correlations	-0.72	-0.72	PROMIS PF + WOMAC Function	Osteoarthritis
Basaran S	2010	Clin Rheumatol	hip osteoarthritis	SF-36 BP	WOMAC Function	SF-36 BP+WOMAC Function	Pearson Correlations	-0.63	-0.63	PROMIS PI + WOMAC Function	Osteoarthritis
Basaran S	2010	Clin Rheumatol	hip osteoarthritis	SF-36 PF	WOMAC Function	SF-36 PF+WOMAC Function	Pearson Correlations	-0.68	-0.68	PROMIS PF + WOMAC Function	Osteoarthritis
Basaran S	2010	Clin Rheumatol	Knee Osteoarthritis	SF-36 BP	WOMAC Pain	SF-36 BP+WOMAC Pain	Pearson Correlations	-0.6	-0.6	PROMIS PI + WOMAC Pain	Osteoarthritis
Basaran S	2010	Clin Rheumatol	Knee Osteoarthritis	SF-36 BP	WOMAC Function	SF-36 BP+WOMAC Function	Pearson Correlations	-0.66	-0.66	PROMIS PI + WOMAC Function	Osteoarthritis
Basaran S	2010	Clin Rheumatol	Knee Osteoarthritis	SF-36 PF	WOMAC Pain	SF-36 PF+WOMAC Pain	Pearson Correlations	-0.57	-0.57	PROMIS PF + WOMAC Pain	Osteoarthritis
Basaran S	2010	Clin Rheumatol	Knee Osteoarthritis	SF-36 PF	WOMAC Function	SF-36 PF+WOMAC Function	Pearson Correlations	-0.76	-0.76	PROMIS PF + WOMAC Function	Osteoarthritis
Pua Y	2009	J Clin Epidemiology	hip osteoarthritis	SF-36 BP	8-m self-preferred speed	SF-36 BP+8-m self-preferred speed	Pearson Correlations	0.15	0.15	PROMIS PI + 20 meter Walk Test	Osteoarthritis
Pua Y	2009	J Clin Epidemiology	hip osteoarthritis	SF-36 BP	WOMAC Function	SF-36 BP+WOMAC Function	Pearson Correlations	0.64	0.64	PROMIS PI + WOMAC Function	Osteoarthritis
Pua Y	2009	J Clin Epidemiology	hip osteoarthritis	SF-36 PF	WOMAC Function	SF-36 PF+WOMAC Function	Pearson Correlations	0.73	0.73	PROMIS PF + WOMAC Function	Osteoarthritis
Sutbeyaz ST	2007	Obesity	Knee Osteoarthritis	SF-36 PF	6 minute walk test	SF-36 PF+6 minute walk test	Spearman Correlations	-0.73	-0.73	PROMIS PF + 6MWT	Osteoarthritis
Sutbeyaz ST	2007	Obesity	Knee Osteoarthritis	SF-36 BP	6 minute walk test	SF-36 BP+6 minute walk test	Spearman Correlations	-0.42	-0.42	PROMIS PI + 6MWT	Osteoarthritis
Sutbeyaz ST	2007	Obesity	Knee Osteoarthritis	SF-36 MH	6 minute walk test	SF-36 MH+6 minute walk test	Spearman Correlations	0.37	0.37	PROMIS Depression + 6MWT	Osteoarthritis
Sutbeyaz ST	2007	Obesity	Knee Osteoarthritis	SF-36 MH	6 minute walk test			0.37	0.37	PROMIS Anxiety + 6MWT	Osteoarthritis
Lingard EA	2001	J Bone Joint Surg Am	Before knee replacement	SF-36 BP	WOMAC Pain	SF-36 BP+WOMAC Pain	Pearson Correlations	0.5	0.5	PROMIS PI + WOMAC Pain	Osteoarthritis
Lingard EA	2001	J Bone Joint Surg Am	Before knee replacement	SF-36 PF	WOMAC Pain	SF-36 PF+WOMAC Pain	Pearson Correlations	0.45	0.45	PROMIS PF + WOMAC Pain	Osteoarthritis
Lingard EA	2001	J Bone Joint Surg Am	Before knee replacement	SF-36 BP	WOMAC Function	SF-36 BP+WOMAC Function	Pearson Correlations	0.62	0.62	PROMIS PI + WOMAC Function	Osteoarthritis
Lingard EA	2001	J Bone Joint Surg Am	Before knee replacement	SF-36 PF	WOMAC Function	SF-36 PF+WOMAC Function	Pearson Correlations	0.69	0.69	PROMIS PF + WOMAC Function	Osteoarthritis
Jin S	2012	World J Gastroenterol	liver transplant donors	SF-36 PCS	SCL-90-R Anxiety	SF-36 PCS+SCL-90-R Anxiety	Pearson Correlations	-0.22	-0.22	PROMIS Anxiety + SF-36 PCS	Other Chronic Disease
Jin S	2012	World J Gastroenterol	liver transplant donors	SF-36 PCS	SCL-90-R Anxiety			-0.22	-0.22	PROMIS Anxiety + SF-36 PF	Other Chronic Disease
Jin S	2012	World J Gastroenterol	liver transplant donors	SF-36 PCS	SCL-90-R Depression	SF-36 PCS+SCL-90-R Depression	Pearson Correlations	-0.31	-0.31	PROMIS Depression + SF-36 PCS	Other Chronic Disease
Jin S	2012	World J Gastroenterol	liver transplant donors	SF-36 PCS	SCL-90-R Depression			-0.31	-0.31	PROMIS Depression + SF-36 PF	Other Chronic Disease
Jin S	2012	World J Gastroenterol	liver transplant donors	SF-36 MCS	SCL-90-R Anxiety	SF-36 MCS+SCL-90-R Anxiety	Pearson Correlations	-0.39	-0.39	PROMIS Anxiety + SF-36 MCS	Other Chronic Disease
Jin S	2012	World J Gastroenterol	liver transplant donors	SF-36 MCS	SCL-90-R Depression	SF-36 MCS+SCL-90-R Depression	Pearson Correlations	-0.56	-0.56	PROMIS Depression + SF-36 MCS	Other Chronic Disease
Montazeri A	2011	Health and Quality of Life Outcomes	Population in Tehran	SF-12v2 PCS	SF-12v2 BP	SF-12v2 PCS+SF-12v2 BP	Spearman Coefficients	0.75	0.75	PROMIS PI + SF-36 PCS	Primarily Healthy Population
Montazeri A	2011	Health and Quality of Life Outcomes	Population in Tehran	SF-12v2 PCS	SF-12v2 BP			0.75	0.75	PROMIS PI + SF-36 PF	Primarily Healthy Population
Montazeri A	2011	Health and Quality of Life Outcomes	Population in Tehran	SF-12v2 PCS	SF-12v2 BP			0.75	0.75	PROMIS PF + SF-36 BP	Primarily Healthy Population
Montazeri A	2011	Health and Quality of Life Outcomes	Population in Tehran	SF-12v2 PCS	SF-12v2 PF (stratified into 2 domains)	SF-12v2 PCS+SF-12v2 PF (stratified into 2 domains)	Spearman Coefficients	0.80, 0.81	0.805	PROMIS PF + SF-36 PCS	Primarily Healthy Population
Montazeri A	2011	Health and Quality of Life Outcomes	Population in Tehran	SF-12v2 PCS	SF-12v2 PF (stratified into 2 domains)				0.805	PROMIS PF + SF-36 PF	Primarily Healthy Population
Montazeri A	2011	Health and Quality of Life Outcomes	Population in Tehran	SF-12v2 MCS	SF-12v2 BP	SF-12v2 MCS+SF-12v2 BP	Spearman Coefficients	0.36	0.36	PROMIS PI + SF-36 MCS	Primarily Healthy Population
Montazeri A	2011	Health and Quality of Life Outcomes	Population in Tehran	SF-12v2 MCS	SF-12v2 PF (stratified into 2 domains)	SF-12v2 MCS+SF-12v2 PF (stratified into 2 domains)	Spearman Coefficients	.13, .16	0.145	PROMIS PF + SF-36 MCS	Primarily Healthy Population
Dell'Osso L	2009	Clin Exp Rheumatol	Fibromyalgia without biopolar disorder	MOODS Depressive Component	SF-36 BP	MOODS Depressive Component+SF-36 BP	Pearson Correlations	0.22	0.22	PROMIS Depression + SF-36 BP	Other Chronic Disease
Dell'Osso L	2009	Clin Exp Rheumatol	Fibromyalgia without biopolar disorder	MOODS Depressive Component	SF-36 BP			0.22	0.22	PROMIS PI + BDI-II	Other Chronic Disease
Dell'Osso L	2009	Clin Exp Rheumatol	Fibromyalgia without biopolar disorder	MOODS Depressive Component	Sf-36 MCS	MOODS Depressive Component+Sf-36 MCS	Pearson Correlations	-0.54	-0.54	PROMIS Depression + SF-36 MCS	Other Chronic Disease
Dell'Osso L	2009	Clin Exp Rheumatol	Fibromyalgia without biopolar disorder	MOODS Depressive Component	SF-36 PCS	MOODS Depressive Component+SF-36 PCS	Pearson Correlations	<0.22	0	PROMIS Depression + SF-36 PCS	Other Chronic Disease
Dell'Osso L	2009	Clin Exp Rheumatol	Fibromyalgia without biopolar disorder	MOODS Depressive Component	SF-36 PCS				0	PROMIS Depression + SF-36 PF	Other Chronic Disease
Jin S	2010	Transplantation Proceedings	liver transplant recepients	SF-36 PCS	SCL-90-R Anxiety	SF-36 PCS+SCL-90-R Anxiety	Pearson Correlations	-0.31	-0.31	PROMIS Anxiety + SF-36 PCS	Other Chronic Disease
Jin S	2010	Transplantation Proceedings	liver transplant recepients	SF-36 PCS	SCL-90-R Anxiety			-0.31	-0.31	PROMIS Anxiety + SF-36 PF	Other Chronic Disease
Jin S	2010	Transplantation Proceedings	liver transplant recepients	SF-36 PCS	SCL-90-R Anxiety			-0.31	-0.31	PROMIS PF + PSS	Other Chronic Disease
Jin S	2010	Transplantation Proceedings	liver transplant recepients	SF-36 PCS	SCL-90-R Depression	SF-36 PCS+SCL-90-R Depression	Pearson Correlations	-0.39	-0.39	PROMIS Depression + SF-36 PCS	Other Chronic Disease
Jin S	2010	Transplantation Proceedings	liver transplant recepients	SF-36 PCS	SCL-90-R Depression			-0.39	-0.39	PROMIS Depression + SF-36 PF	Other Chronic Disease
Jin S	2010	Transplantation Proceedings	liver transplant recepients	SF-36 PCS	SCL-90-R Depression			-0.39	-0.39	PROMIS PF + BDI-II	Other Chronic Disease
Jin S	2010	Transplantation Proceedings	liver transplant recepients	SF-36 MCS	SCL-90-R Anxiety	SF-36 MCS+SCL-90-R Anxiety	Pearson Correlations	-0.62	-0.62	PROMIS Anxiety + SF-36 MCS	Other Chronic Disease
Jin S	2010	Transplantation Proceedings	liver transplant recepients	SF-36 MCS	SCL-90-R Depression	SF-36 MCS+SCL-90-R Depression	Pearson Correlations	-0.68	-0.68	PROMIS Depression + SF-36 MCS	Other Chronic Disease
Feola M	2013	Open Cardiovasc Med J	in-hospital congestive heart failure patients before discharge	6 minute walk test	Geriatric Depression scale or Hospital Anxiety and Depression Scale	6 minute walk test+Geriatric Depression scale or Hospital Anxiety and Depression Scale	Pearson Correlations?	0.18	0.18	PROMIS Depression + 6MWT	Other Chronic Disease
Motl RW	2013	Eur J Phys Rehabil Med	Multiple Sclerosis	6 minute walk test	HADS- Depression Subscale	6 minute walk test+HADS- Depression Subscale	Spearman Coefficients	-0.26	-0.26	PROMIS Depression + 6MWT	Other Chronic Disease
Motl RW	2013	Eur J Phys Rehabil Med	controls	6 minute walk test	HADS- Depression Subscale	6 minute walk test+HADS- Depression Subscale	Spearman Coefficients	-0.1	-0.1	PROMIS Depression + 6MWT	Primarily Healthy Population
Wood DW	2012	Spine J	Neurogenic or Vascular Claudication	Maximum Ambulation Distance	SF-36 PCS	Maximum Ambulation Distance+SF-36 PCS	Pearson Correlations	0.518	0.518	PROMIS PF + 6MWT	Primarily Healthy Population
Wood DW	2012	Spine J	Neurogenic or Vascular Claudication	Maximum Ambulation Distance	CES-D	Maximum Ambulation Distance+CES-D	Pearson Correlations	-0.267	-0.267	PROMIS Depression + 6MWT	Other Chronic Disease
Olivares PR	2011	Health and Quality of Life Outcomes	community-dwelling middle aged and older adults	6 minute walk test	EQ-5D-3L: Pain/Discomfort Dimension	6 minute walk test+EQ-5D-3L: Pain/Discomfort Dimension	Spearman Coefficients	-0.16	-0.16	PROMIS PI + 6MWT	Primarily Healthy Population
Halank M	2013	Lung	Pulmonary Hypertension	6 minute walk test	SF-36 Physical Function	6 minute walk test+SF-36 Physical Function	Spearman Coefficients	0.733	0.733	PROMIS PF + 6MWT	Other Chronic Disease
Halank M	2013	Lung	Pulmonary Hypertension	6 minute walk test	SF-36 Bodily Pain Subscale	6 minute walk test+SF-36 Bodily Pain Subscale	Spearman Coefficients	0.38	0.38	PROMIS PI + 6MWT	Other Chronic Disease
Gottlieb SS	2009	Am J Cardiol	Patientswth Heart failure	6 minute walk test	Beck Depression Inventory	6 minute walk test+Beck Depression Inventory	Back calculated from univaraite R2	0.11	0.11	PROMIS Depression + 6MWT	Other Chronic Disease
Zeifang F	2008	BMC Musculoskelet Disord	Symptomatic lumbar spinal stenosis	Maximum Ambulation Distance	CES-D	Maximum Ambulation Distance+CES-D	Kendall's tau-b	-0.05	-0.05	PROMIS Depression + 6MWT	Other Chronic Disease
Juenger J	2002	Heart	Congestive Heart Failure	6 minute walk test	SF-36 Physical Function	6 minute walk test+SF-36 Physical Function	Spearman Coefficients	0.56	0.56	PROMIS PF + 6MWT	Other Chronic Disease
Juenger J	2002	Heart	Congestive Heart Failure	6 minute walk test	SF-36 Bodily Pain Subscale	6 minute walk test+SF-36 Bodily Pain Subscale	Spearman Coefficients	0.26	0.26	PROMIS PI + 6MWT	Other Chronic Disease
Chung L	2013	Arthritis Care Res	patients with airway and parenchymal lung disease	6 minute walk test	HAQ-DI	6 minute walk test+HAQ-DI	Pearson Correlations	-0.4	-0.4	PROMIS Depression + 6MWT	Other Chronic Disease
Unnanuntana A	2012	J Arthroplasty	pre-operative total hip arthroplasty	2 minute walk test	SF-36 Physical Function	2 minute walk test+SF-36 Physical Function	Pearson Correlations	0.41	0.41	PROMIS PF + 6MWT	Osteoarthritis
Unnanuntana A	2012	J Arthroplasty	pre-operative total hip arthroplasty	2 minute walk test	SF-36 Bodily Pain Subscale	2 minute walk test+SF-36 Bodily Pain Subscale	Pearson Correlations	0.52	0.52	PROMIS PI + 6MWT	Osteoarthritis
Mannerkorpi K	2006	Arch Phys Med Rehabil	Fibromyalgia	6 minute walk test	SF-36 Physical Function	6 minute walk test+SF-36 Physical Function	Spearman Coefficients	0.49	0.49	PROMIS PF + 6MWT	Other Chronic Disease
Mannerkorpi K	2006	Arch Phys Med Rehabil	Fibromyalgia	6 minute walk test	SF-36 Bodily Pain Subscale	6 minute walk test+SF-36 Bodily Pain Subscale	Spearman Coefficients	0.38	0.38	PROMIS PI + 6MWT	Other Chronic Disease
Carbonell-Baeza A	2013	Pain Management Nursing	Female Fibromyalgia	6 minute walk test	SF-36 Physical Function	6 minute walk test+SF-36 Physical Function	Spearman Coefficients	0.35	0.35	PROMIS PF + 6MWT	Other Chronic Disease
Carbonell-Baeza A	2013	Pain Management Nursing	Female Fibromyalgia	6 minute walk test	SF-36 Bodily Pain Subscale	6 minute walk test+SF-36 Bodily Pain Subscale	Spearman Coefficients	0.26	0.26	PROMIS PI + 6MWT	Other Chronic Disease
Buchner DM	1996	J Gerontology	Older adults	40-m walk test	CES-D	40-m walk test+CES-D	Pearson Correlation	-0.22	-0.22	PROMIS Depression + 20 meter Walk Test	Primarily Healthy Population
Buchner DM	1996	J Gerontology	Older adults	40-m walk test	CES-D			-0.22	-0.22	PROMIS Anxiety + 20 meter Walk Test	Primarily Healthy Population
Cella D	2010	J Clin Epidemiology	US General Population	PROMIS Physical Function (Short Form)	SF-36 PF	PROMIS Physical Function (Short Form)+SF-36 PF	Correlation coefficient?	0.9	0.9	PROMIS PF + SF-36 PF	Primarily Healthy Population
Cella D	2010	J Clin Epidemiology	US General Population	PROMIS Physical Function (Short Form)	SF-36 PF			0.9	0.9	PROMIS PF + SF-36 PCS	Primarily Healthy Population
Vereščiagina K	2007	Medicina	disc herniation w low back pain	SF-36 PF	SF-36 BP	SF-36 PF+SF-36 BP	Correlation coefficient?	0.6	0.6	PROMIS PF + SF-36 BP	Other Chronic Disease
Vereščiagina K	2007	Medicina	disc herniation w low back pain	SF-36 PF	SF-36 BP			0.6	0.6	PROMIS PI + SF-36 PF	Other Chronic Disease
Vereščiagina K	2007	Medicina	disc herniation w low back pain	SF-36 PF	SF-36 BP			0.6	0.6	PROMIS PI + SF-36 PCS	Other Chronic Disease
Stadnyk K	1998	J Clin Epidemiology	Frail Elderly Population	SF-36 PF	SF-36 BP	SF-36 PF+SF-36 BP		0.22	0.22	PROMIS PF + SF-36 BP	Primarily Healthy Population
Stadnyk K	1998	J Clin Epidemiology	Frail Elderly Population	SF-36 PF	SF-36 BP			0.22	0.22	PROMIS PI + SF-36 PF	Primarily Healthy Population
Stadnyk K	1998	J Clin Epidemiology	Frail Elderly Population	SF-36 PF	SF-36 BP			0.22	0.22	PROMIS PI + SF-36 PCS	Primarily Healthy Population
Stadnyk K	1998	J Clin Epidemiology	Frail Elderly Population	SF-36 PF	SF-36 MH	SF-36 PF+SF-36 MH		0.07	0.07	PROMIS PF + SF-36 MCS	Primarily Healthy Population
									-0.31	PROMIS Depression + SF-36 BP	Current Study (Symptomatic Osteoarthritis)
									0.19	PROMIS Depression + WOMAC Pain	Current Study (Symptomatic Osteoarthritis)
									-0.3	PROMIS Depression + SF-36 PCS	Current Study (Symptomatic Osteoarthritis)
									-0.31	PROMIS Depression + SF-36 PF	Current Study (Symptomatic Osteoarthritis)
									0.1	PROMIS Depression + WOMAC Function	Current Study (Symptomatic Osteoarthritis)
									-0.11	PROMIS Depression + 6MWT	Current Study (Symptomatic Osteoarthritis)
									0.11	PROMIS Depression + 20 meter Walk Test	Current Study (Symptomatic Osteoarthritis)
									0.65	PROMIS Depression + PSS	Current Study (Symptomatic Osteoarthritis)
									0.7	PROMIS Depression + BDI-II	Current Study (Symptomatic Osteoarthritis)
									-0.59	PROMIS Depression + SF-36 MCS	Current Study (Symptomatic Osteoarthritis)
									-0.41	PROMIS Anxiety + SF-36 BP	Current Study (Symptomatic Osteoarthritis)
									0.2	PROMIS Anxiety + WOMAC Pain	Current Study (Symptomatic Osteoarthritis)
									-0.4	PROMIS Anxiety + SF-36 PCS	Current Study (Symptomatic Osteoarthritis)
									-0.34	PROMIS Anxiety + SF-36 PF	Current Study (Symptomatic Osteoarthritis)
									0.17	PROMIS Anxiety + WOMAC Function	Current Study (Symptomatic Osteoarthritis)
									-0.19	PROMIS Anxiety + 6MWT	Current Study (Symptomatic Osteoarthritis)
									0.17	PROMIS Anxiety + 20 meter Walk Test	Current Study (Symptomatic Osteoarthritis)
									0.71	PROMIS Anxiety + PSS	Current Study (Symptomatic Osteoarthritis)
									0.7	PROMIS Anxiety + BDI-II	Current Study (Symptomatic Osteoarthritis)
									-0.58	PROMIS Anxiety + SF-36 MCS	Current Study (Symptomatic Osteoarthritis)
									0.59	PROMIS PF + SF-36 BP	Current Study (Symptomatic Osteoarthritis)
									-0.39	PROMIS PF + WOMAC Pain	Current Study (Symptomatic Osteoarthritis)
									0.76	PROMIS PF + SF-36 PCS	Current Study (Symptomatic Osteoarthritis)
									0.79	PROMIS PF + SF-36 PF	Current Study (Symptomatic Osteoarthritis)
									-0.48	PROMIS PF + WOMAC Function	Current Study (Symptomatic Osteoarthritis)
									0.46	PROMIS PF + 6MWT	Current Study (Symptomatic Osteoarthritis)
									-0.43	PROMIS PF + 20 meter Walk Test	Current Study (Symptomatic Osteoarthritis)
									-0.38	PROMIS PF + PSS	Current Study (Symptomatic Osteoarthritis)
									-0.53	PROMIS PF + BDI-II	Current Study (Symptomatic Osteoarthritis)
									0.39	PROMIS PF + SF-36 MCS	Current Study (Symptomatic Osteoarthritis)
									-0.73	PROMIS PI + SF-36 BP	Current Study (Symptomatic Osteoarthritis)
									0.47	PROMIS PI + WOMAC Pain	Current Study (Symptomatic Osteoarthritis)
									-0.73	PROMIS PI + SF-36 PCS	Current Study (Symptomatic Osteoarthritis)
									-0.62	PROMIS PI + SF-36 PF	Current Study (Symptomatic Osteoarthritis)
									0.43	PROMIS PI + WOMAC Function	Current Study (Symptomatic Osteoarthritis)
									-0.38	PROMIS PI + 6MWT	Current Study (Symptomatic Osteoarthritis)
									0.34	PROMIS PI + 20 meter Walk Test	Current Study (Symptomatic Osteoarthritis)
									0.46	PROMIS PI + PSS	Current Study (Symptomatic Osteoarthritis)
									0.55	PROMIS PI + BDI-II	Current Study (Symptomatic Osteoarthritis)
									-0.47	PROMIS PI + SF-36 MCS	Current Study (Symptomatic Osteoarthritis)

## Sheet: Reference List
References
1	Amtmann D, Cook KF, Jensen MP, Chen WH, Choi S, Revicki D, et al. Development of a PROMIS item bank to measure pain interference. Pain. 2010;150(1):173-82.
2	Khanna D, Maranian P, Rothrock N, Cella D, Gershon R, Khanna PP, et al. Feasibility and construct validity of PROMIS and "legacy" instruments in an academic scleroderma clinic. Value Health. 2012;15(1):128-34.
3	Alkan BM, Fidan F, Tosun A, Ardicoglu O. Quality of life and self-reported disability in patients with knee osteoarthritis. Mod Rheumatol. 2014;24(1):166-71.
4	Axford J, Butt A, Heron C, Hammond J, Morgan J, Alavi A, et al. Prevalence of anxiety and depression in osteoarthritis: use of the Hospital Anxiety and Depression Scale as a screening tool. Clin Rheumatol. 2010;29(11):1277-83.
5	Bajaj JS, Thacker LR, Wade JB, Sanyal AJ, Heuman DM, Sterling RK, et al. PROMIS computerised adaptive tests are dynamic instruments to measure health-related quality of life in patients with cirrhosis. Aliment Pharmacol Ther. 2011;34(9):1123-32.
6	Basaran S, Guzel R, Seydaoglu G, Guler-Uysal F. Validity, reliability, and comparison of the WOMAC osteoarthritis index and Lequesne algofunctional index in Turkish patients with hip or knee osteoarthritis. Clin Rheumatol. 2010;29(7):749-56.
7	Bilbao A, Quintana JM, Escobar A, Las Hayas C, Orive M. Validation of a proposed WOMAC short form for patients with hip osteoarthritis. Health Qual Life Outcomes. 2011;9:75.
8	Boury JM, Larkin KT, Krummel DA. Factors related to postpartum depressive symptoms in low-income women. Women Health. 2004;39(3):19-34.
9	Buchner DM, Cress ME, Esselman PC, Margherita AJ, de Lateur BJ, Campbell AJ, et al. Factors associated with changes in gait speed in older adults. J Gerontol A Biol Sci Med Sci. 1996;51(6):M297-302.
10	Carbonell-Baeza A, Ruiz JR, Aparicio VA, Ortega FB, Delgado-Fernandez M. The 6-minute walk test in female fibromyalgia patients: relationship with tenderness, symptomatology, quality of life, and coping strategies. Pain Manag Nurs. 2013;14(4):193-9.
11	Cella D, Riley W, Stone A, Rothrock N, Reeve B, Yount S, et al. The Patient-Reported Outcomes Measurement Information System (PROMIS) developed and tested its first wave of adult self-reported health outcome item banks: 2005-2008. J Clin Epidemiol. 2010;63(11):1179-94.
12	Chung L, Chen H, Khanna D, Steen VD. Dyspnea assessment and pulmonary hypertension in patients with systemic sclerosis: utility of the University of California, San Diego, Shortness of Breath Questionnaire. Arthritis Care Res (Hoboken). 2013;65(3):454-63.
13	Davis AM, Perruccio AV, Canizares M, Hawker GA, Roos EM, Maillefert JF, et al. Comparative, validity and responsiveness of the HOOS-PS and KOOS-PS to the WOMAC physical function subscale in total joint replacement for osteoarthritis. Osteoarthritis Cartilage. 2009;17(7):843-7.
14	Dell'Osso L, Bazzichi L, Consoli G, Carmassi C, Carlini M, Massimetti E, et al. Manic spectrum symptoms are correlated to the severity of pain and the health-related quality of life in patients with fibromyalgia. Clin Exp Rheumatol. 2009;27(5 Suppl 56):S57-61.
15	Di Benedetto M, Lindner H, Hare DL, Kent S. The role of coping, anxiety, and stress in depression post-acute coronary syndrome. Psychol Health Med. 2007;12(4):460-9.
16	Feola M, Garnero S, Vallauri P, Salvatico L, Vado A, Leto L, et al. Relationship between Cognitive Function, Depression/Anxiety and Functional Parameters in Patients Admitted for Congestive Heart Failure. Open Cardiovasc Med J. 2013;7:54-60.
17	Fuh JL, Wang SJ, Lu SR, Juang KD, Lee SJ. Psychometric evaluation of a Chinese (Taiwanese) version of the SF-36 health survey amongst middle-aged women from a rural community. Qual Life Res. 2000;9(6):675-83.
18	Gandhi R, Tsvetkov D, Dhottar H, Davey JR, Mahomed NN. Quantifying the pain experience in hip and knee osteoarthritis. Pain Res Manag. 2010;15(4):224-8.
19	Georgin-Lavialle S, Moura DS, Bruneau J, Chauvet-Gelinier JC, Damaj G, Soucie E, et al. Leukocyte telomere length in mastocytosis: correlations with depression and perceived stress. Brain Behav Immun. 2014;35:51-7.
20	Gerhard P, Bolt R, Duck K, Mayer R, Friederich NF, Hirschmann MT. Long-term results of arthroscopically assisted anatomical single-bundle anterior cruciate ligament reconstruction using patellar tendon autograft: are there any predictors for the development of osteoarthritis? Knee Surg Sports Traumatol Arthrosc. 2013;21(4):957-64.
21	Gottlieb SS, Kop WJ, Ellis SJ, Binkley P, Howlett J, O'Connor C, et al. Relation of depression to severity of illness in heart failure (from Heart Failure And a Controlled Trial Investigating Outcomes of Exercise Training [HF-ACTION]). Am J Cardiol. 2009;103(9):1285-9.
22	Guermazi M, Poiraudeau S, Yahia M, Mezganni M, Fermanian J, Habib Elleuch M, et al. Translation, adaptation and validation of the Western Ontario and McMaster Universities osteoarthritis index (WOMAC) for an Arab population: the Sfax modified WOMAC. Osteoarthritis Cartilage. 2004;12(6):459-68.
23	Halank M, Einsle F, Lehman S, Bremer H, Ewert R, Wilkens H, et al. Exercise capacity affects quality of life in patients with pulmonary hypertension. Lung. 2013;191(4):337-43.
24	Hinchcliff M, Beaumont JL, Thavarajah K, Varga J, Chung A, Podlusky S, et al. Validity of two new patient-reported outcome measures in systemic sclerosis: Patient-Reported Outcomes Measurement Information System 29-item Health Profile and Functional Assessment of Chronic Illness Therapy-Dyspnea short form. Arthritis Care Res (Hoboken). 2011;63(11):1620-8.
25	Homann D, Stefanello JM, Goes SM, Breda CA, Paiva Edos S, Leite N. Stress perception and depressive symptoms: functionality and impact on the quality of life of women with fibromyalgia. Rev Bras Reumatol. 2012;52(3):319-30.
26	Hung M, Baumhauer JF, Latt LD, Saltzman CL, SooHoo NF, Hunt KJ. Validation of PROMIS (R) Physical Function computerized adaptive tests for orthopaedic foot and ankle outcome research. Clin Orthop Relat Res. 2013;471(11):3466-74.
27	Jackson FM, Rowley DL, Curry Owens T. Contextualized stress, global stress, and depression in well-educated, pregnant, African-American women. Womens Health Issues. 2012;22(3):e329-36.
28	Jin S, Yan L, Li B, Wen T, Zhao J, Zeng Y, et al. Quality of life and psychologic distress of recipients after adult living-donor liver transplantation (LDLT)-A study from mainland China. Transplant Proc. 2010;42(7):2611-6.
29	Jin SG, Xiang B, Yan LN, Chen ZY, Yang JY, Xu MQ, et al. Quality of life and psychological outcome of donors after living donor liver transplantation. World J Gastroenterol. 2012;18(2):182-7.
30	Juenger J, Schellberg D, Kraemer S, Haunstetter A, Zugck C, Herzog W, et al. Health related quality of life in patients with congestive heart failure: comparison with other chronic diseases and relation to functional variables. Heart. 2002;87(3):235-41.
31	Lee S, Park M, Choi S, Nah Y, Abbey SE, Rodin G. Stress, coping, and depression in non-ulcer dyspepsia patients. J Psychosom Res. 2000;49(1):93-9.
32	Lin RF, Chang JJ, Lu YM, Huang MH, Lue YJ. Correlations between quality of life and psychological factors in patients with chronic neck pain. Kaohsiung J Med Sci. 2010;26(1):13-20.
33	Lingard EA, Katz JN, Wright RJ, Wright EA, Sledge CB. Validity and responsiveness of the Knee Society Clinical Rating System in comparison with the SF-36 and WOMAC. J Bone Joint Surg Am. 2001;83-a(12):1856-64.
34	Mannerkorpi K, Svantesson U, Broberg C. Relationships between performance-based tests and patients' ratings of activity limitations, self-efficacy, and pain in fibromyalgia. Arch Phys Med Rehabil. 2006;87(2):259-64.
35	McCarthy CJ, Oldham JA. The reliability, validity and responsiveness of an aggregated locomotor function (ALF) score in patients with osteoarthritis of the knee. Rheumatology (Oxford). 2004;43(4):514-7.
36	Montazeri A, Vahdaninia M, Mousavi SJ, Asadi-Lari M, Omidvari S, Tavousi M. The 12-item medical outcomes study short form health survey version 2.0 (SF-12v2): a population-based validation study from Tehran, Iran. Health Qual Life Outcomes. 2011;9:12.
37	Motl RW, Balantrapu S, Pilutti L, Dlugonski D, Suh Y, Sandroff BM, et al. Symptomatic correlates of six-minute walk performance in persons with multiple sclerosis. Eur J Phys Rehabil Med. 2013;49(1):59-66.
38	Neumann L, Berzak A, Buskila D. Measuring health status in Israeli patients with fibromyalgia syndrome and widespread pain and healthy individuals: utility of the short form 36-item health survey (SF-36). Semin Arthritis Rheum. 2000;29(6):400-8.
39	Olivares PR, Gusi N, Prieto J, Hernandez-Mocholi MA. Fitness and health-related quality of life dimensions in community-dwelling middle aged and older adults. Health Qual Life Outcomes. 2011;9:117.
40	Ozcetin A, Ataoglu S, Kocer E, Yazici S, Yildiz O, Ataoglul A, et al. Effects of depression and anxiety on quality of life of patients with rheumatoid arthritis, knee osteoarthritis and fibromyalgia syndrome. West Indian Med J. 2007;56(2):122-9.
41	Palmieri VO, Santovito D, Margari F, Lozupone M, Minerva F, Di Gennaro C, et al. Psychopathological profile and health-related quality of life (HRQOL) in patients with hepatocellular carcinoma (HCC) and cirrhosis. Clin Exp Med. 2013.
42	Papakostidou I, Dailiana ZH, Papapolychroniou T, Liaropoulos L, Zintzaras E, Karachalios TS, et al. Factors affecting the quality of life after total knee arthroplasties: a prospective study. BMC Musculoskelet Disord. 2012;13:116.
43	Piccinni A, Maser JD, Bazzichi L, Rucci P, Vivarelli L, Del Debbio A, et al. Clinical significance of lifetime mood and panic-agoraphobic spectrum symptoms on quality of life of patients with rheumatoid arthritis. Compr Psychiatry. 2006;47(3):201-8.
44	Pua YH, Cowan SM, Wrigley TV, Bennell KL. The Lower Extremity Functional Scale could be an alternative to the Western Ontario and McMaster Universities Osteoarthritis Index physical function scale. J Clin Epidemiol. 2009;62(10):1103-11.
45	Segal DL, Coolidge FL, Cahill BS, O'Riley AA. Psychometric properties of the Beck Depression Inventory II (BDI-II) among community-dwelling older adults. Behav Modif. 2008;32(1):3-20.
46	Senders A, Hanes D, Bourdette D, Whitham R, Shinto L. Reducing survey burden: feasibility and validity of PROMIS measures in multiple sclerosis. Mult Scler. 2014;20(8):1102-11.
47	Stadnyk K, Calder J, Rockwood K. Testing the measurement properties of the Short Form-36 Health Survey in a frail elderly population. J Clin Epidemiol. 1998;51(10):827-35.
48	Stolwijk-Swuste JM, Beelen A, Lankhorst GJ, Nollet F. SF36 physical functioning scale and 2-minute walk test advocated as core qualifiers to evaluate physical functioning in patients with late-onset sequelae of poliomyelitis. J Rehabil Med. 2008;40(5):387-94.
49	Sutbeyaz ST, Sezer N, Koseoglu BF, Ibrahimoglu F, Tekin D. Influence of knee osteoarthritis on exercise capacity and quality of life in obese adults. Obesity (Silver Spring). 2007;15(8):2071-6.
50	Unnanuntana A, Mait JE, Shaffer AD, Lane JM, Mancuso CA. Performance-based tests and self-reported questionnaires provide distinct information for the preoperative evaluation of total hip arthroplasty patients. J Arthroplasty. 2012;27(5):770-5.e1.
51	Veresciagina K, Ambrozaitis KV, Spakauskas B. Health-related quality-of-life assessment in patients with low back pain using SF-36 questionnaire. Medicina (Kaunas). 2007;43(8):607-13.
52	Wolfe F. Determinants of WOMAC function, pain and stiffness scores: evidence for the role of low back pain, symptom counts, fatigue and depression in osteoarthritis, rheumatoid arthritis and fibromyalgia. Rheumatology (Oxford). 1999;38(4):355-61.
53	Wood DW, Haig AJ, Yamakawa KS. Fear of movement/(re)injury and activity avoidance in persons with neurogenic versus vascular claudication. Spine J. 2012;12(4):292-300.
54	Xie F, Li SC, Goeree R, Tarride JE, O'Reilly D, Lo NN, et al. Validation of Chinese Western Ontario and McMaster Universities Osteoarthritis Index (WOMAC) in patients scheduled for total knee replacement. Qual Life Res. 2008;17(4):595-601.
55	Zeifang F, Schiltenwolf M, Abel R, Moradi B. Gait analysis does not correlate with clinical and MR imaging parameters in patients with symptomatic lumbar spinal stenosis. BMC Musculoskelet Disord. 2008;9:89.
